# Supplementary material for: Charge transport properties of co-evaporated organic–inorganic thin film charge transfer complexes: effects of intermolecular interactions
Source: Royal Society of Chemistry journal article supplement (doi:10.1039/d0tc04278a), 2020-01-01
Supplement: d0tc04278a1.pdf [file d0tc04278a1.pdf]

## Supporting Information

### Charge transport properties of co-evaporated organic-inorganic thin film charge transfer complexes: effects of intermolecular interactions

Dong Shen,<sup>a</sup> Yan Wu,<sup>a</sup> Ming-Fai Lo,<sup>\*a</sup> and Chun-Sing Lee<sup>\*a</sup>

<sup>a</sup>Center of Super-Diamond and Advanced Films (COSDAF) and Department of Chemistry, City University of Hong Kong, Hong Kong SAR, P. R. China.

E-mail: mingflo@cityu.edu.hk; apcslee@cityu.edu.hk

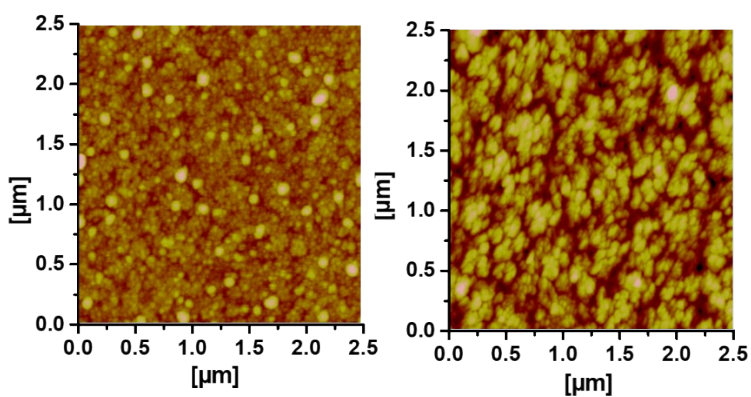

**Fig. S1** AFM images of MoO<sub>3</sub>:6T (left) and pure 6T (right) films

AFM images of the MoO<sub>3</sub>:6T and pristine 6T films are shown in Fig. S1. Obviously, the surface of MoO<sub>3</sub>:6T is smoother than 6T, with root mean square (Rms) roughness of ~3 nm and 5 nm, respectively. No observable pinholes are shown in their surface morphologies.

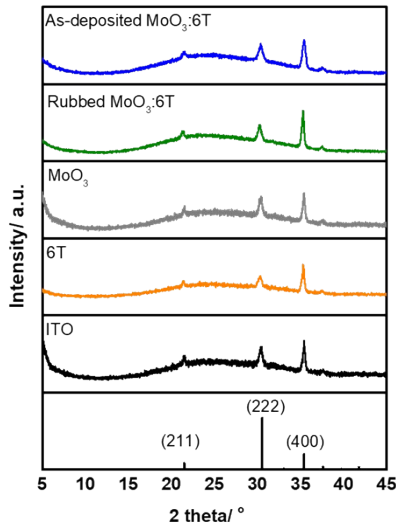

**Fig. S2** XRD patterns of the as-deposited MoO<sub>3</sub>:6T, rubbed MoO<sub>3</sub>:6T, MoO<sub>3</sub> and 6T deposited on ITO substrates

XRD data of the as-deposited MoO<sub>3</sub>:6T, rubbed MoO<sub>3</sub>:6T, MoO<sub>3</sub> and 6T deposited on ITO substrates are shown in Fig. S2. All these films show the XRD peaks of the ITO substrate. No other detectable peaks from the 6T, MoO<sub>3</sub> or the CTC are observed, demonstrating the amorphous nature of these vacuum-deposited films.
